# Supplementary material for: Prediction of Future Spatial and Temporal Evolution Trends of Reference Evapotranspiration in the Yellow River Basin, China
Source: MDPI journal article supplement (doi:10.3390/rs14225674), 2022-11-10
Supplement: s1 [file s1]

# Supplementary material: Prediction of future spatial and temporal evolution trends of reference evapotranspiration in the Yellow River Basin, China

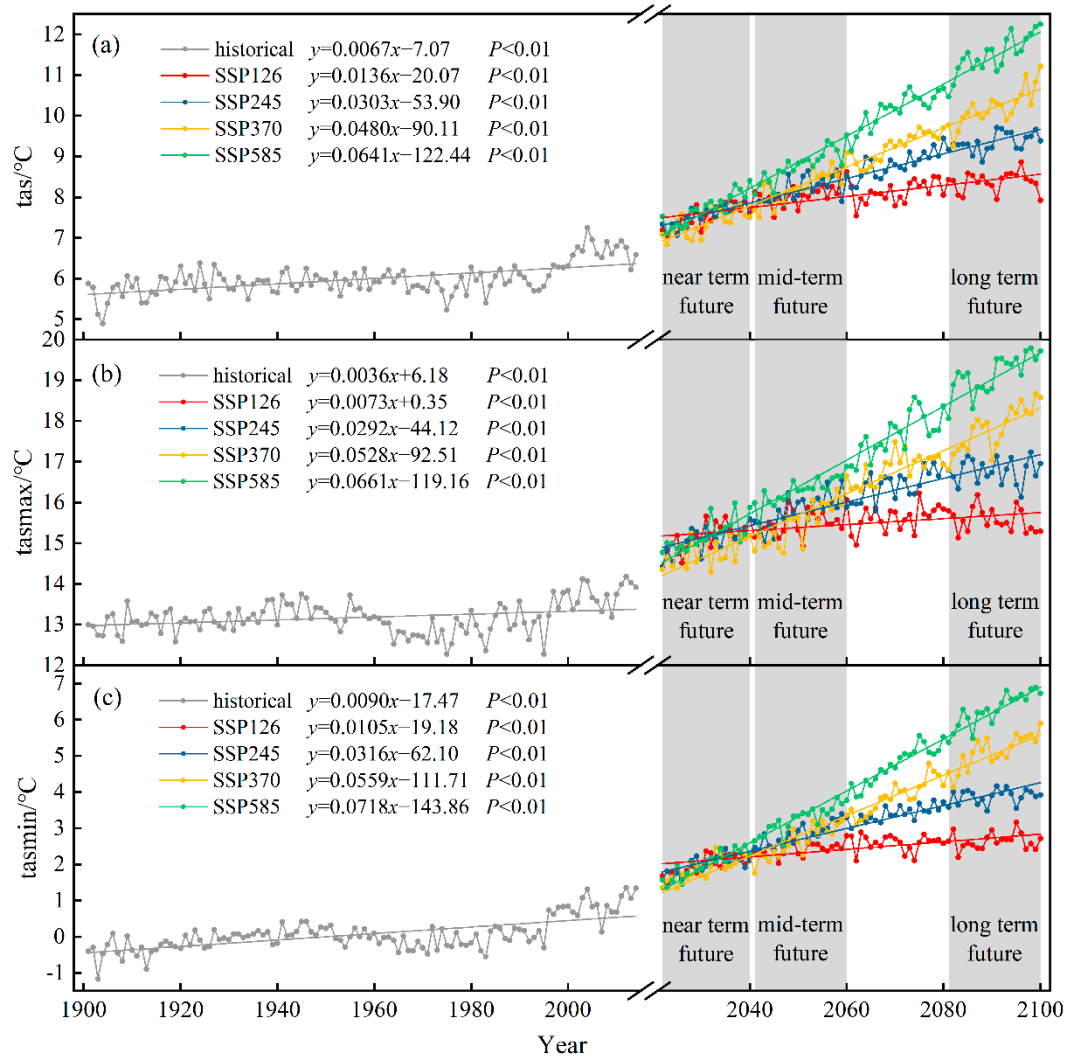

**Figure S1.** Interannual variations in tas(a)/tasmax(b)/tasmin(c) in the Yellow River Basin over the historical period (1901–2014) and under different future emission scenarios (2022–2100; SSP126, SSP245, SSP370, and SSP585) ( $P$  is an indicator of significance obtained by F-test).

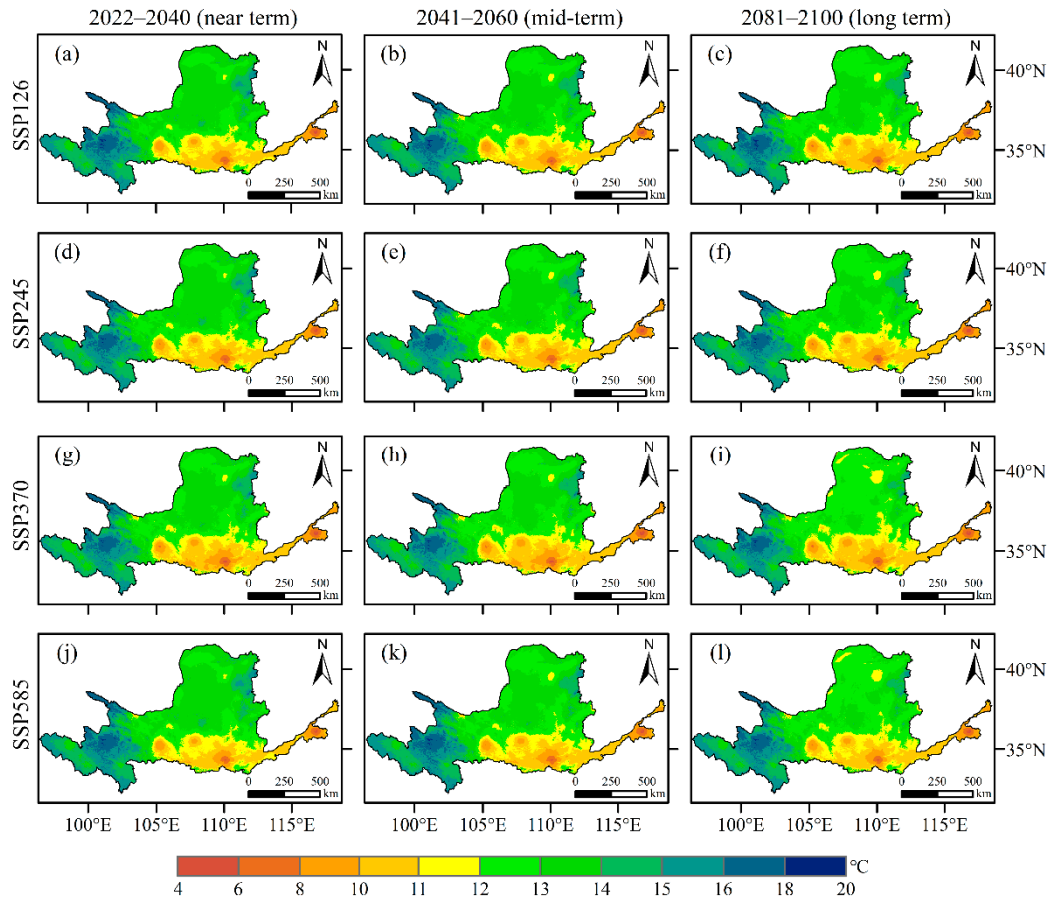

**Figure S2.** Spatial variations in the near (2022–2040; **a**, **d**, **g**, and **j**), mid- (2041–2060; **b**, **e**, **h**, and **k**), and long (2081–2100; **c**, **f**, **i**, and **l**) term future difference between tasmax and tasmin of the Yellow River Basin relative to the historical period (1901–2014) under four SSP scenarios (SSP126, SSP245, SSP370, and SSP585).

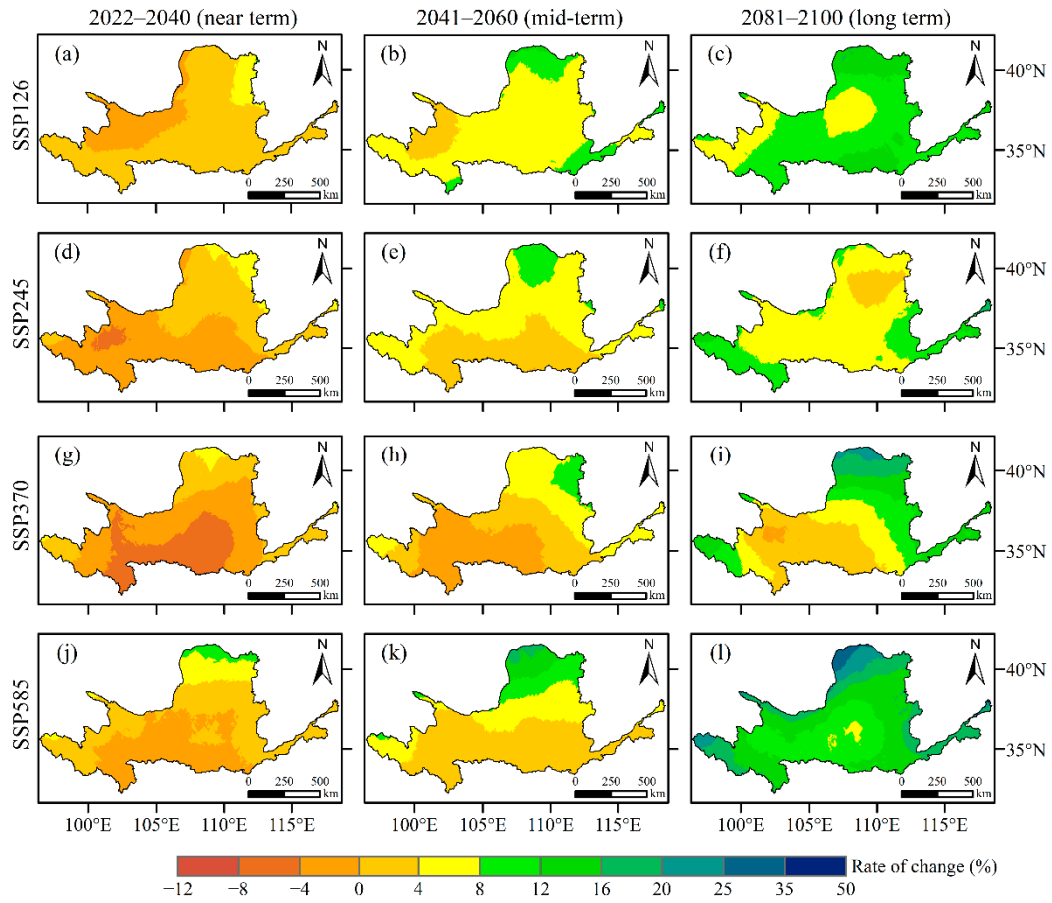

**Figure S3.** Spatial variations in the near (2022–2040; a, d, g, and j), mid- (2041–2060; b, e, h, and k), and long (2081–2100; c, f, i, and l) term future annual precipitation of the Yellow River Basin relative to the historical period (1901–2014) under four SSP scenarios (SSP126, SSP245, SSP370, and SSP585).
